# Supplementary material for: Effectiveness and Safety of Enteric-Coated vs Uncoated Aspirin in Patients With Cardiovascular Disease: A Secondary Analysis of the ADAPTABLE Randomized Clinical Trial
Source: PubMed Central journal article supplement (PMC10551818; doi:10.1001/jamacardio.2023.3364), 2023-10-04
Supplement: jamacardiol-e233364-s002.pdf [file jamacardiol-e233364-s002.pdf]

1  
2 **Enteric Coated Aspirin in the ADAPTABLE Trial**

---

3 **Date:** November 17<sup>th</sup> 2021  
4 **Title:** Enteric Coated Effect on Outcomes in Aspirin Dosing and Patient-Reported Outcomes  
5 from ADAPTABLE: A Patient-Centric Trial Assessing Benefits and Long-Term  
6 Effectiveness

7  
8 **Principle Investigator:** Mark B. Efron,  
9 **Corresponding Author:** Mark B. Efron (mark.effron@ochsner.org)  
10 Co-Investigator(s): Amber Sleem, Schuler Jones  
11 **Principle Statistician:** Amanda Stebbins  
12 Statistical Advisor: Lisa Wruck

13  
14 **Target journal:** JAMA, JAMA-Cardiology, JACC or JAHA

15  
16 EPM Code: 6516-XX  
17

18  
19 Background  
20

21 Many physicians advise patients with cardiovascular disease to use enteric coated aspirin (EC-ASA)  
22 preparations in order to decrease GI bleeding complications. Data from pharmacodynamic studies suggest  
23 there is decreased platelet inhibition with EC-ASA compared with ASA without EC. This study will evaluate EC-  
24 ASA is as clinically effective as uncoated ASA.  
25

26 Data is mixed on whether enteric coated aspirin reduces the protective effect of ASA in patients with  
27 cardiovascular disease. Pharmacodynamic studies suggest that enteric coating on ASA decreases the  
28 antiplatelet effect of ASA and results in an increased rate of "ASA resistance", but there are no clear clinical  
29 outcomes data that support the relevance of the pharmacodynamic studies.

30 Given that over 10,000 subjects in ADAPTABLE reported the type of ASA they were using, insight into the  
31 benefits and/or detriments of enteric coated ASA in cardiovascular patients can be obtained.

32

## 33 Primary Objectives/Aims

34

35 **Primary Hypothesis:** To assess the effectiveness of Enteric coated aspirin compared to plain ASA in preventing  
36 cardiovascular events

37 Hypothesis: *The effectiveness of enteric coated aspirin will be the same as plain aspirin.*

38

39 **Aim 1:** To examine whether the effectiveness and safety of low (81 mg daily) vs. high-dose (325 mg  
40 daily) aspirin is consistent between participants taking enteric coated and plain aspirin.

41 Hypothesis: *The effectiveness and safety of low vs. high-dose aspirin in patients with established  
42 ASCVD is consistent between participants administered enteric and plain coated aspirin.*

43

44 **Aim 2:** Describe differences in baseline clinical characteristics and CV risk factors by enteric coated and  
45 not plain aspirin.

46

47 **Aim 2:** To examine whether enteric coated aspirin will have the same bleeding rate as plain aspirin.

48 Hypothesis: *The safety events of enteric coated aspirin will be comparable for patients  
49 administered enteric coated and plain aspirin.*

50

## 51 Endpoints

### 52 • Efficacy Endpoints

#### 53 ○ Primary

54 ■ Death/MI/Stroke

#### 55 ○ Secondary

56 ■ All-cause mortality

57 ■ Hospitalization for Myocardial Infarction

58 ■ Hospitalization for Stroke

59 ■ Coronary revascularization

60 ■ TIA

61

### 62 • Safety Endpoints

#### 63 ○ Primary

64 ■ Hospitalization for major bleeding with associated blood product transfusion

#### 65 ○ Secondary

66 ■ Hospitalization for GI Bleed

67 ■ Any GI bleed (if reported)

68

## 69 Data

### 70 Population:

- 71 • All patients randomized in the ADAPTABLE Trial.

72

### 73 Inclusion Criteria:

- 74 • Participants reported taking enteric coated or plain aspirin.

75

### 76 Exclusion Criteria:

- 77 • Participants missing type of aspirin coating.

78

79

80  
81  
82  
83  
84  
85  
86  
87  
88  
89  
90  
91  
92  
93  
94  
95  
96  
97  
98  
99

**General Analysis Conventions:**

- Unless otherwise noted, all hypothesis tests will be 2-sided. P-values  $< 0.05$  will be interpreted as statistically significant.
- Analyses for this manuscript will be interpreted as exploratory. No formal adjustment for multiple hypothesis testing will be made.
- Missing values will be excluded from descriptive statistical summaries. For multivariable analyses (e.g., multivariable models) the extent and patterns of missing data will be assessed, and a suitable imputation approach will be implemented.
- Analysis will be performed using SAS 9.4 (or higher version). Other software may be used if required and determined to be appropriate.

**Quality Assurance Measures:**

- To reduce the risk of error, all tables and figures will be generated in an automated fashion. In the rare circumstance where results are “cut and pasted” visual checks will be performed to ensure errors were not made.
- The reviewing statistician will provide code review as needed before results are finalized, particularly for objectives that involve complex statistical modelling.

100

101 **Analysis Objectives**

102 1. **Objective:** Compare baseline characteristics of patients by enteric coated and plain aspirin.

103 **Analysis:** Continuous variables will be presented as median and 25<sup>th</sup>/75<sup>th</sup> percentiles, mean, standard  
104 deviation and minimum and maximum values. Categorical variables will be presented as counts and  
105 proportions. P-values will be reported from the Chi-square test for discrete measures and the T  
106 test/Wilcoxon Rank Sum test for continuous variables.

107

108 **See Appendix:** Table 1 Characteristics of participants at baseline

109

110 2. **Objective:** Describe the clinical outcomes at median follow-up time by treatment and type of aspirin coating.

111 **Analysis:** Unadjusted and adjusted Cox proportional hazards models with an interaction between  
112 treatment arm and aspirin coating will be fit to the data. An interaction term will be included in the  
113 primary endpoint model and all cause mortality model, to assess if the enteric coating modifies the  
114 association between treatment and these pre-specified outcomes. Hazard ratios and 95% CI will be  
115 computed.

116

117 Adjustment measures include age, sex, ethnicity, strata, race, prior aspirin use, P2Y12 use at baseline,  
118 smoking status, no internet access, history of afib, bleeding, cad, chf, cvd, diabetes, hypertension,  
119 hyperlipidemia, prior MI, and PAD.

120

121 **See Appendix:**

122

123 Table 3: Interaction between enteric coating or plain aspirin and treatment for primary  
124 composite outcome and all cause mortality.

125

126 Table 4: Event details by aspirin coating at median all cause mortality follow-up time for primary  
127 composite outcome, key secondary effectiveness outcomes and primary safety outcomes.

128

129 Table 5: Event details by Aspirin dose and type of coating at median follow-up time for primary  
130 composite outcome, key secondary effectiveness outcomes and primary safety outcomes.

131

132 Figure 1. Cumulative incidence of the primary effectiveness endpoint in for participants taking  
133 enteric coated or plain aspirin (cumulative incidence graph with log-rank p-value).

134

135 **Results and Potential Conclusions:** Event rates, counts and adjusted hazard ratios (95% CI) and the interaction p-value  
136 from the adjusted model will be included, when an interaction term is included in the models. If the p-value for the  
137 interaction is significant ( $p < 0.05$ ), then the results can be interpreted such that there is a differential treatment effect of  
138 aspirin doses (81 mg and 325 mg) between type of aspirin coating on the clinical outcome.

139

140 If the p-value for the interaction is not significant ( $p > 0.5$ ) then it will be removed.

141

**Appendix Table 1** Characteristics of participants at baseline

| <b>Characteristics</b>                                     | <b>Enteric coated</b> | <b>Plain coated Aspirin</b> | <b>P Value</b> |
|------------------------------------------------------------|-----------------------|-----------------------------|----------------|
| Aspirin Group: 81mg                                        | XX.X                  | XX.X                        |                |
| Aspirin Group: 325 mg                                      | XX.X                  | XX.X                        |                |
| Age yrs, mean st. dev, median, (25th, 75th)                | XX (XX, XX)           | XX (XX, XX)                 |                |
| Weight kg, mean st. dev, median (25th, 75th)               | XX (XX, XX)           | XX (XX, XX)                 |                |
| Height cm, mean st. dev, median (25th, 75th)               | XX (XX, XX)           | XX (XX, XX)                 |                |
| BMI kg/ m <sup>2</sup> , mean st. dev, median (25th, 75th) | XX (XX, XX)           | XX (XX, XX)                 |                |
| Female, no. (%)                                            |                       |                             |                |
| Race, no. (%)                                              |                       |                             |                |
| White                                                      | XX.X                  | XX.X                        |                |
| Black or African American                                  | XX.X                  | XX.X                        |                |
| Asian                                                      | XX.X                  | XX.X                        |                |
| Hispanic ethnicity                                         | XX.X                  | XX.X                        |                |
| <b>Medical history, no. (%)</b>                            |                       |                             |                |
| Prior myocardial infarction                                | XX.X                  | XX.X                        |                |
| Prior coronary revascularization                           | XX.X                  | XX.X                        |                |
| Prior percutaneous coronary intervention                   | XX.X                  | XX.X                        |                |
| Prior coronary artery bypass graft surgery                 | XX.X                  | XX.X                        |                |
| Hypertension                                               | XX.X                  | XX.X                        |                |
| Dyslipidemia                                               | XX.X                  | XX.X                        |                |
| Diabetes mellitus                                          | XX.X                  | XX.X                        |                |
| Atrial fibrillation                                        | XX.X                  | XX.X                        |                |
| Cerebrovascular disease                                    | XX.X                  | XX.X                        |                |
| PAD                                                        | XX.X                  | XX.X                        |                |
| Congestive heart failure                                   | XX.X                  | XX.X                        |                |
| Chronic obstructive pulmonary disease/Asthma               | XX.X                  | XX.X                        |                |
| Chronic kidney disease                                     | XX.X                  | XX.X                        |                |
| Peripheral artery disease                                  | XX.X                  | XX.X                        |                |
| Prior significant gastrointestinal bleed                   | XX.X                  | XX.X                        |                |

**Appendix Table 1** Characteristics of participants at baseline

| <b>Characteristics</b>                                                | <b>Enteric coated</b> | <b>Plain coated Aspirin</b> | <b>P Value</b> |
|-----------------------------------------------------------------------|-----------------------|-----------------------------|----------------|
| Prior intracranial hemorrhage                                         | XX.X                  | XX.X                        |                |
| Peptic ulcer disease                                                  | XX.X                  | XX.X                        |                |
| Current smoker                                                        | XX.X                  | XX.X                        |                |
| P2Y12                                                                 | XX.X                  | XX.X                        |                |
| Medication for upset stomach                                          | XX.X                  | XX.X                        |                |
| Medications at the time of randomization,<br>no. (%)                  |                       |                             |                |
| Aspirin use before study                                              |                       |                             |                |
| Missing                                                               | XX.X                  | XX.X                        |                |
| No                                                                    | XX.X                  | XX.X                        |                |
| Yes                                                                   | XX.X                  | XX.X                        |                |
| Prior daily dosage                                                    |                       |                             |                |
| 81 mg                                                                 | XX.X                  | XX.X                        |                |
| 162 mg                                                                | XX.X                  | XX.X                        |                |
| 325 mg                                                                | XX.X                  | XX.X                        |                |
| Missing                                                               | XX.X                  | XX.X                        |                |
| Clopidogrel                                                           | XX.X                  | XX.X                        |                |
| Prasugrel                                                             | XX.X                  | XX.X                        |                |
| Other antiplatelet medication (Ticlopidine,<br>Vorapaxar, Cilostazol) | XX.X                  | XX.X                        |                |

151

152

**Appendix Table 2.** Pre-specified adjustment measures for primary composite outcome and key secondary effectiveness outcomes

153

154

Note: X indicates the measure will be included in the multivariable model

| Baseline Measures                                      | Number Missing | Percent Missing (%) | Primary Endpoint | Nonfatal MI | Nonfatal Stroke | PCI CABG | All Cause Mortality | Primary Safety |
|--------------------------------------------------------|----------------|---------------------|------------------|-------------|-----------------|----------|---------------------|----------------|
| Age                                                    | 0              | 0                   | X                | X           | X               | X        | X                   | X              |
| Sex                                                    | 0              | 0                   | X                | X           | X               | X        | X                   | X              |
| Current Smoker                                         | 0              | 0                   | X                | X           | X               | X        | X                   |                |
| Year of Randomization                                  | 0              | 0                   |                  |             |                 |          |                     |                |
| Randomized treatment                                   | 0              | 0                   | X                | X           | X               | X        | X                   | X              |
| Randomization follow-up strata                         | 0              | 0                   | X                | X           |                 | X        | X                   |                |
| Non-internet user at randomization                     | 0              | 0                   | X                | X           |                 | X        | X                   |                |
| Data mart                                              | 0              | 0                   |                  |             |                 |          |                     |                |
| Current health                                         | 0              | 0                   |                  |             |                 |          |                     |                |
| Physical function                                      | 0              | 0                   |                  |             |                 |          |                     |                |
| How invited to join                                    | 1              | 0                   |                  |             |                 |          |                     |                |
| Ethnicity                                              | 270            | 1.8                 | X                | X           | X               | X        | X                   |                |
| Medical History, Coronary Artery Disease               | 414            | 2.7                 | X                | X           | X               | X        | X                   |                |
| Medical History, MI                                    | 414            | 2.7                 | X                | X           |                 | X        | X                   |                |
| History of CABG                                        | 414            | 2.7                 | X                | X           |                 | X        | X                   |                |
| History of PCI                                         | 414            | 2.7                 | X                | X           |                 | X        | X                   |                |
| Medical History, Cerebrovascular Disease               | 414            | 2.7                 | X                | X           | X               | X        | X                   |                |
| Medical History, Hypertension                          | 414            | 2.7                 | X                | X           | X               | X        | X                   | X              |
| Medical History, Hyperlipidemia                        | 414            | 2.7                 | X                | X           | X               | X        | X                   |                |
| Medical History, Atrial Fibrillation                   | 414            | 2.7                 | X                | X           | X               | X        | X                   |                |
| Medical History, Congestive Heart Failure              | 414            | 2.7                 | X                | X           | X               | X        | X                   |                |
| Medical History, Peripheral Arterial Disease           | 414            | 2.7                 | X                | X           | X               | X        | X                   |                |
| Medical History, Diabetes Mellitus                     | 414            | 2.7                 | X                | X           | X               | X        | X                   |                |
| History of bleeding [GI Bleed, ICH, Bleeding disorder] | 414            | 2.7                 | X                |             |                 |          |                     |                |
| Prior Aspirin experience/dose                          | 973            | 6.5                 | X                | X           | X               | X        | X                   |                |
| Race group                                             | 980            | 6.5                 | X                | X           | X               | X        | X                   |                |
| Anti-inflammatory                                      | 1260           | 8.4                 |                  |             |                 |          |                     |                |
| Medication for stomach upset                           | 1260           | 8.4                 |                  |             |                 |          |                     |                |
| Baseline P2Y12                                         | 1261           | 8.4                 | X                |             | X               |          |                     | X              |
| Weight (kg)                                            | 2008           | 13.3                |                  |             |                 |          |                     |                |
| Body Mass Index (kg/m <sup>2</sup> )                   | 2352           | 15.6                | X                | X           | X               | X        | X                   | X              |
| LDL-c                                                  | 7088           | 47                  |                  |             |                 |          |                     |                |
| HbA1c                                                  | 9510           | 63.1                |                  |             |                 |          |                     |                |

155

156

157 **Appendix Table 3.** Interaction between type of aspirin coating and treatment for primary composite outcome and key  
 158 secondary effectiveness outcomes

159

| Outcome                                                           | Enteric coated |             |                                | Plain coated Aspirin |             |                                | Adjusted Model Interaction p value |
|-------------------------------------------------------------------|----------------|-------------|--------------------------------|----------------------|-------------|--------------------------------|------------------------------------|
|                                                                   | 81 Mg Rate     | 325 mg Rate | Adjusted Hazard Ratio (95% CI) | 81 Mg Rate           | 325 mg Rate | Adjusted Hazard Ratio (95% CI) |                                    |
| <b>Primary composite endpoint:</b> All-cause death, MI, or stroke |                |             |                                |                      |             |                                | XXX                                |
| All-cause death                                                   |                |             |                                |                      |             |                                |                                    |
| Nonfatal MI                                                       |                |             |                                |                      |             |                                |                                    |
| Nonfatal Stroke                                                   |                |             |                                |                      |             |                                |                                    |
| Revasc                                                            |                |             |                                |                      |             |                                |                                    |
| TIA                                                               |                |             |                                |                      |             |                                |                                    |
| Safety Major Bleeding                                             |                |             |                                |                      |             |                                |                                    |
| Hospitalization for GI Bleed                                      |                |             |                                |                      |             |                                |                                    |

160

161

162

163

164

165



**Appendix Table 4.** Event details by type of aspirin coating at median follow-up time for primary composite outcome, key secondary effectiveness outcomes and primary safety outcomes.

| <b>Outcome</b>                                                                     | <b>Enteric Coated<br/>Events (rate)</b> | <b>Plain Aspirin<br/>Events (rate)</b> | <b>Unadjusted Hazard<br/>Ratio (95% CI)</b> | <b>p value</b> |
|------------------------------------------------------------------------------------|-----------------------------------------|----------------------------------------|---------------------------------------------|----------------|
| <b>Primary composite endpoint:</b>                                                 |                                         |                                        |                                             |                |
| All-cause death, MI, or stroke                                                     | XXX( YY%)                               | XXX( YY%)                              |                                             | XXX            |
| All-cause death                                                                    | XXX( YY%)                               | XXX( YY%)                              |                                             |                |
| Hospitalization for MI                                                             | XXX( YY%)                               | XXX( YY%)                              |                                             |                |
| Hospitalization for stroke                                                         | XXX( YY%)                               | XXX( YY%)                              |                                             |                |
| Hospitalization for TIA                                                            | XXX( YY%)                               | XXX( YY%)                              |                                             |                |
| Hospitalization for major bleeding<br>with associated blood product<br>transfusion | XXX( YY%)                               | XXX( YY%)                              |                                             |                |
| Hospitalization for GI Bleed                                                       | XXX( YY%)                               | XXX( YY%)                              |                                             |                |

CI, confidence interval; MI, myocardial infarction;

Rates are calculated at median follow-up (26.2 months) using the Kalbfleisch & Prentice cumulative incidence function estimator. Events include data from electronic health record data, CMS claims, private insurance claims and confirmed participant reported outcomes (PROs).

**Appendix Table 5.** Event details by coated aspirin type at median follow-up time for all cause mortality, key secondary effectiveness outcomes, primary safety outcomes and limb endpoints.

|                                                                              | Enteric Coated |             | Plain Coated |             |
|------------------------------------------------------------------------------|----------------|-------------|--------------|-------------|
|                                                                              | 81 Mg Rate     | 325 mg Rate | 81 Mg Rate   | 325 mg Rate |
| <b>Primary composite endpoint:</b> All-cause death, MI, or stroke            | XXX( YY%)      | XXX( YY%)   | XXX( YY%)    | XXX( YY%)   |
| All-cause death                                                              | XXX( YY%)      | XXX( YY%)   | XXX( YY%)    | XXX( YY%)   |
| Hospitalization for MI                                                       | XXX( YY%)      | XXX( YY%)   | XXX( YY%)    | XXX( YY%)   |
| Hospitalization for stroke                                                   | XXX( YY%)      | XXX( YY%)   | XXX( YY%)    | XXX( YY%)   |
| Hospitalization for TIA                                                      | XXX( YY%)      | XXX( YY%)   | XXX( YY%)    | XXX( YY%)   |
| Hospitalization for major bleeding with associated blood product transfusion | XXX( YY%)      | XXX( YY%)   | XXX( YY%)    | XXX( YY%)   |
| Hospitalization for GI Bleed                                                 | XXX( YY%)      | XXX( YY%)   | XXX( YY%)    | XXX( YY%)   |
| Hospitalization for Revascularization                                        | XXX( YY%)      | XXX( YY%)   | XXX( YY%)    | XXX( YY%)   |

MI, myocardial infarction;

Rates are calculated at median follow-up (26.2 months) using the Kalbfleisch & Prentice cumulative incidence function estimator. Events include data from electronic health record data, CMS claims, private insurance claims and confirmed participant reported outcomes (PROs).

168

169

170 **Appendix Figure 1.** Time-to-event curves for the primary effectiveness outcome (death/MI/stroke) by enteric coated  
171 aspirin or plain aspirin.

172 Caption: Cumulative incidence of the primary effectiveness outcome of all-cause death, hospitalization for myocardial  
173 infarction, or hospitalization for stroke reported by Type of Aspirin Coating.

174

175

176

177
