# Supplementary material for: Effectiveness and Safety of Enteric-Coated vs Uncoated Aspirin in Patients With Cardiovascular Disease: A Secondary Analysis of the ADAPTABLE Randomized Clinical Trial
Source: PubMed Central journal article supplement (PMC10551818; doi:10.1001/jamacardio.2023.3364), 2023-10-04
Supplement: jamacardiol-e233364-s004.pdf [file jamacardiol-e233364-s004.pdf]

## **Data Sharing Statement**

### **Data**

**Data available:** Yes

**Data types:** Deidentified participant data

**How to access data:** Data from ADAPTABLE will be shared publicly according to PCORI requirements. Final steps are being completed to deposit the study data in the Inter-university Consortium for Political and Social Research (ICPSR) at the University of Michigan.

**When available:** With publication

### **Supporting Documents**

**Document types:** None

### **Additional Information**

**Who can access the data:** Data from ADAPTABLE will be shared publicly according to PCORI requirements. Final steps are being completed to deposit the study data in the Inter-university Consortium for Political and Social Research (ICPSR) at the University of Michigan.

**Types of analyses:** Data from ADAPTABLE will be shared publicly according to PCORI requirements. Final steps are being completed to deposit the study data in the Inter-university Consortium for Political and Social Research (ICPSR) at the University of Michigan.

**Mechanisms of data availability:** Data from ADAPTABLE will be shared publicly according to PCORI requirements. Final steps are being completed to deposit the study data in the Inter-university Consortium for Political and Social Research (ICPSR) at the University of Michigan.
